# Supplementary material for: A conductive ZnO–ZnGaON nanowire-array-on-a-film photoanode for stable and efficient sunlight water splitting
Source: Royal Society of Chemistry journal article supplement (doi:10.1039/c3ee43806f), 2014-01-01

### SEM image of the ZnO photoanode before PEC measurement

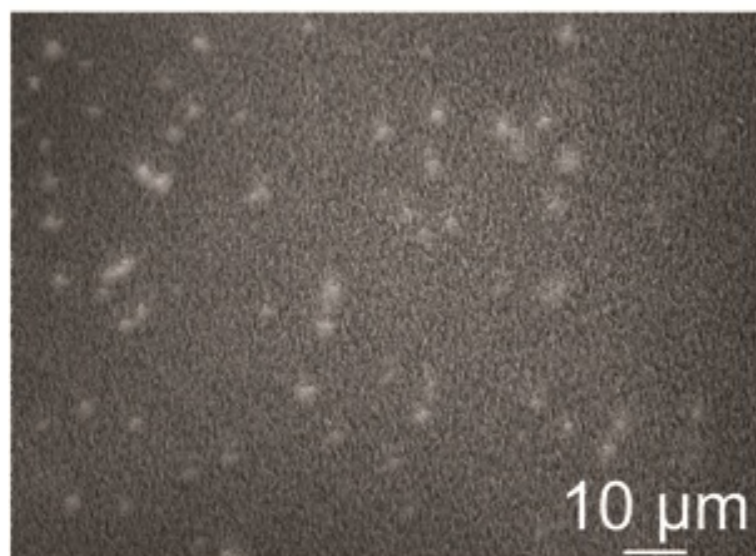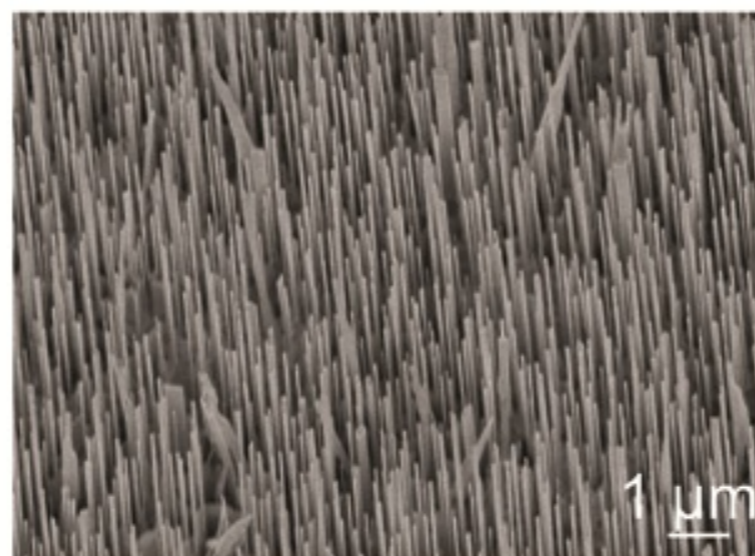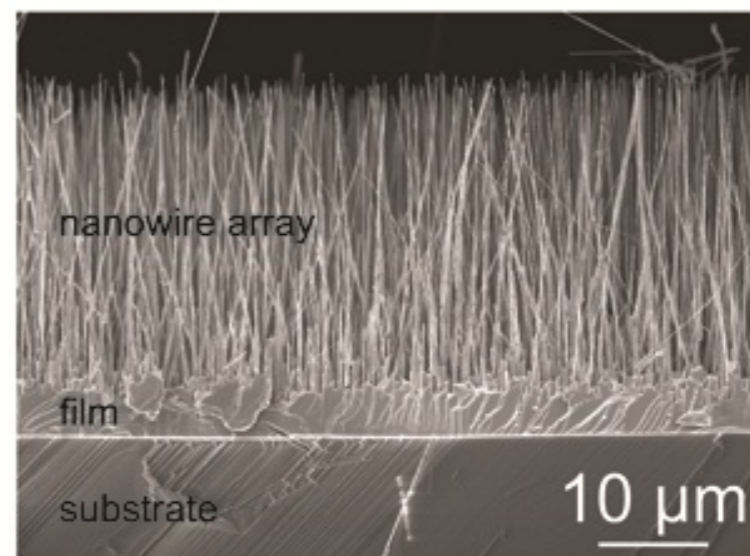

### SEM image of the ZnO photoanode after 1 hour PEC measurement

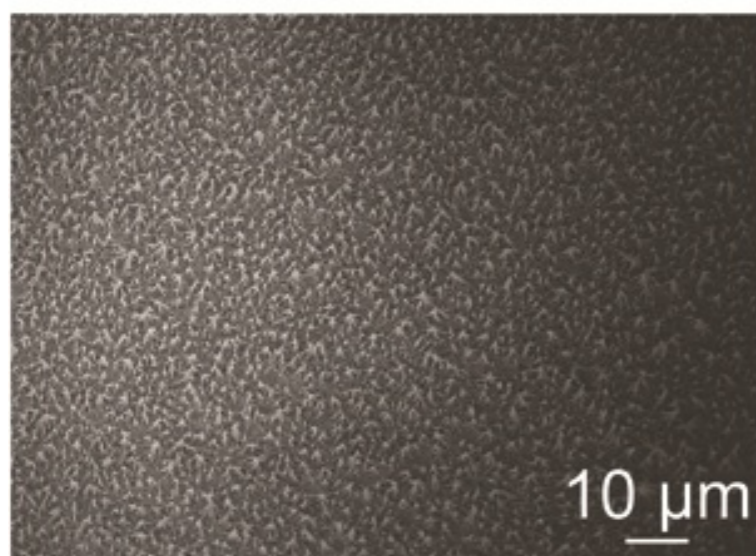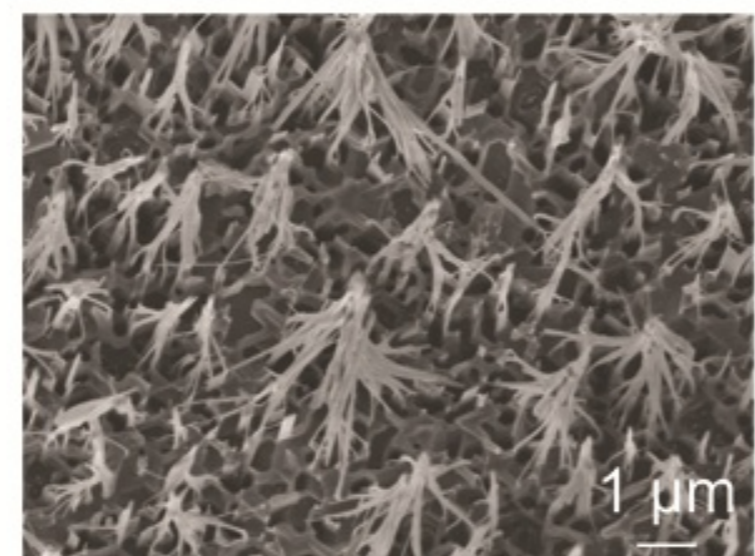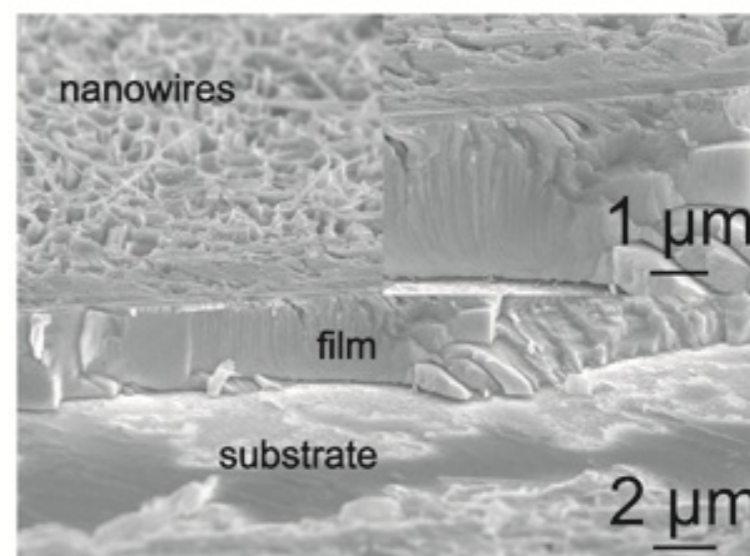

### SEM image of the ZnO photoanode after 5.5 hours PEC measurement

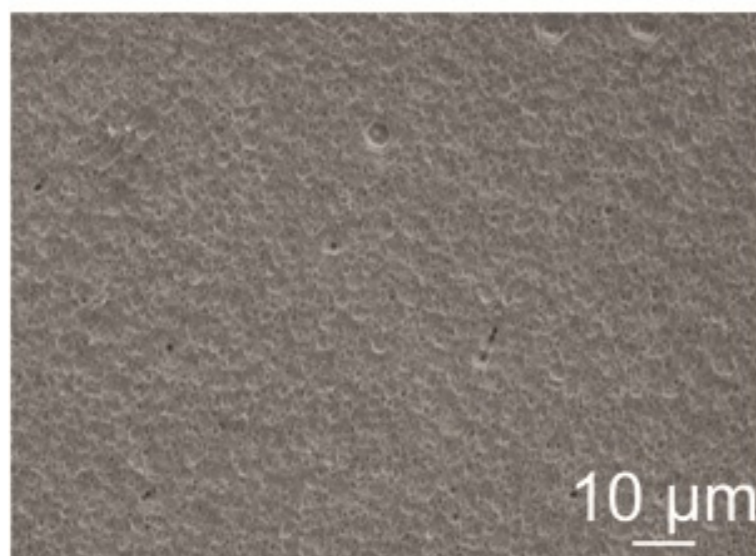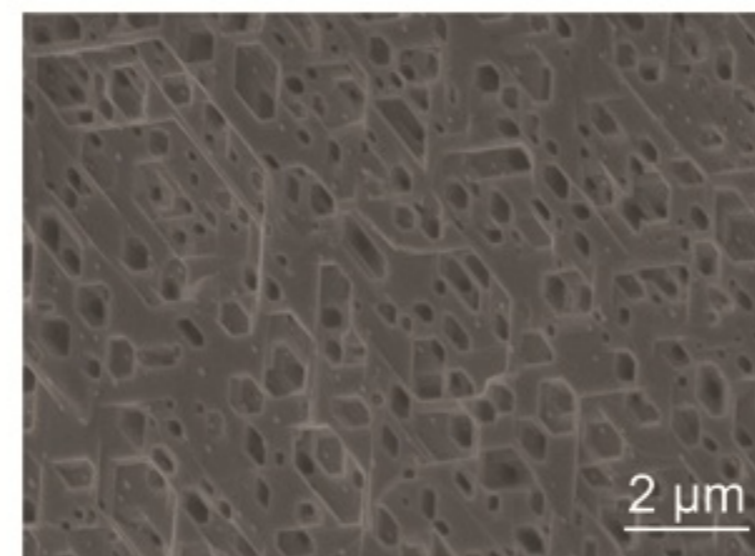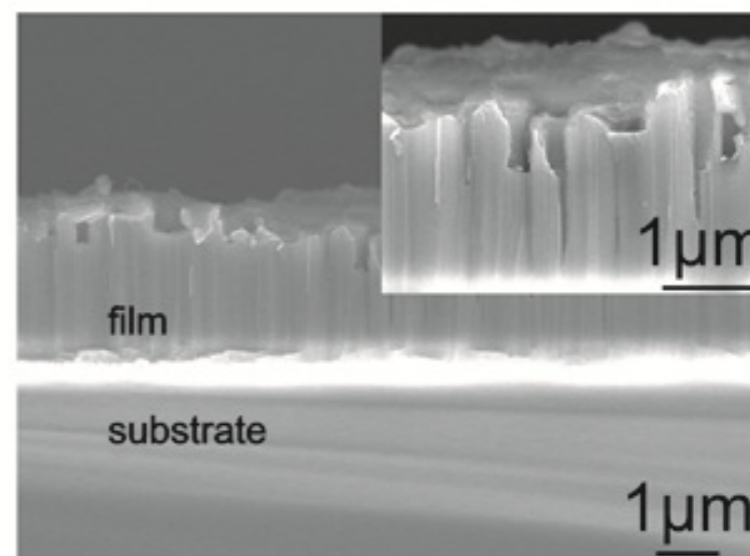

Supplement: c3ee43806f5.pdf [file c3ee43806f5.pdf]
