# Supplementary figures and images for: A conductive ZnO–ZnGaON nanowire-array-on-a-film photoanode for stable and efficient sunlight water splitting
Source: Royal Society of Chemistry journal article supplement (doi:10.1039/c3ee43806f), 2014-01-01

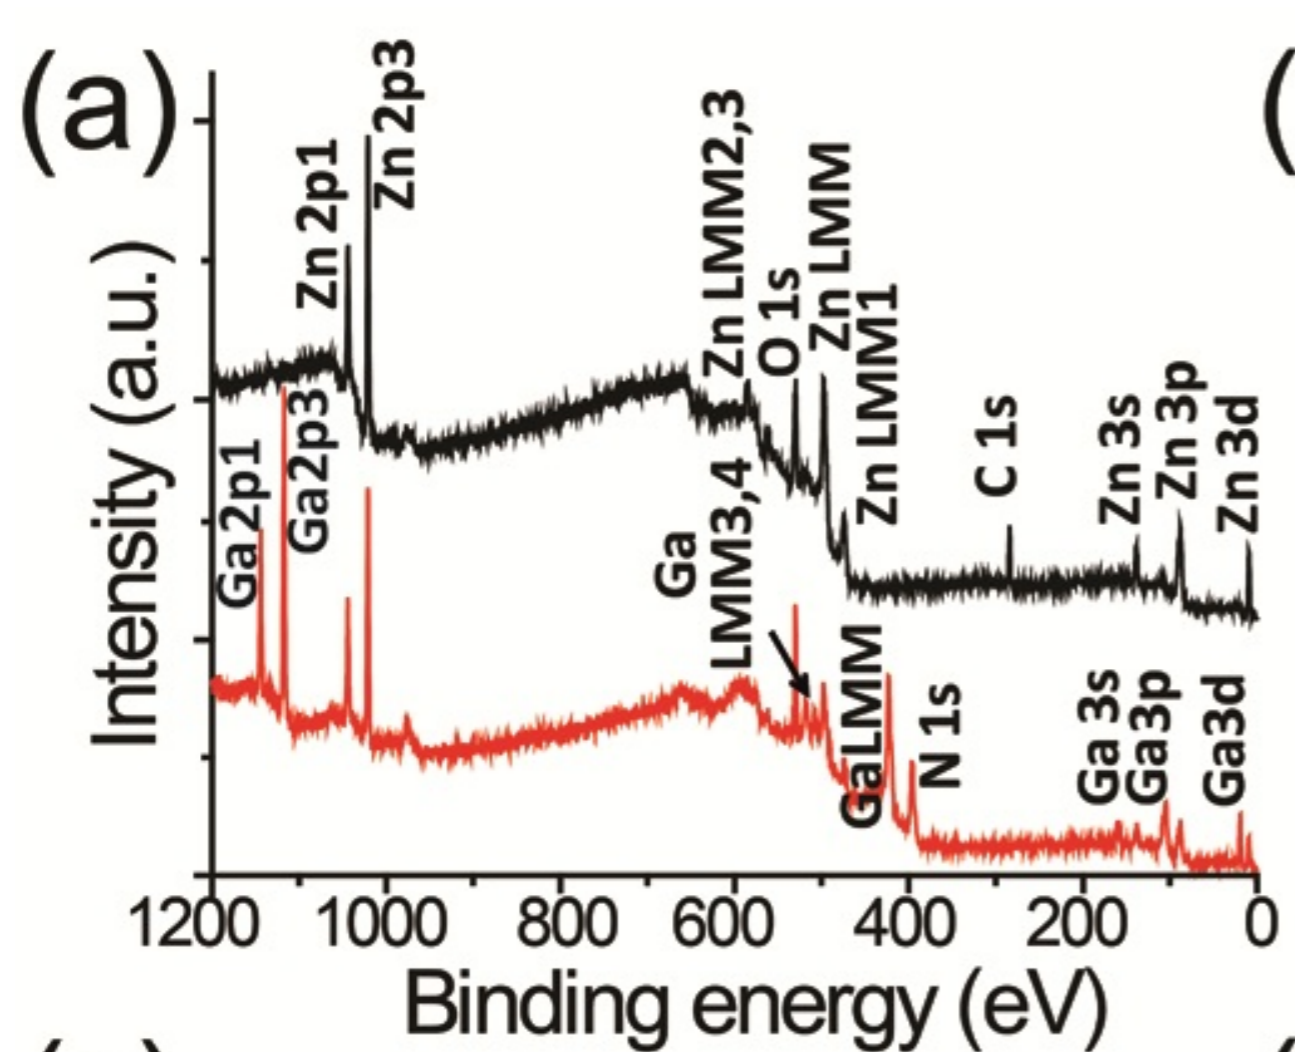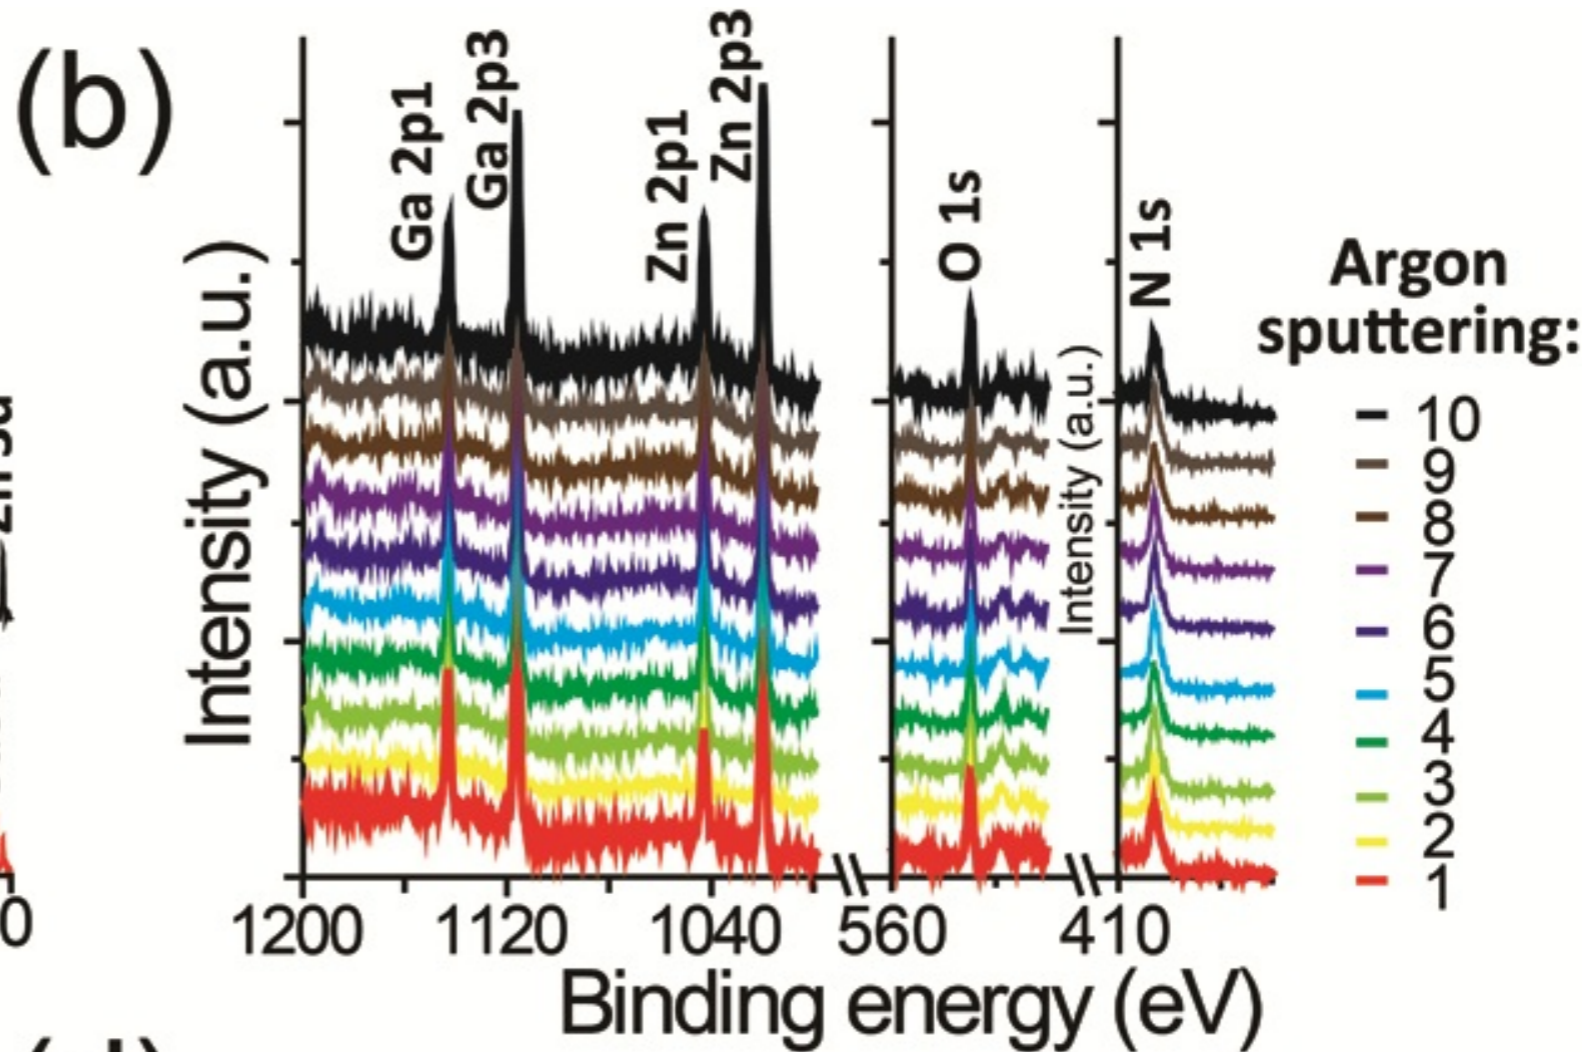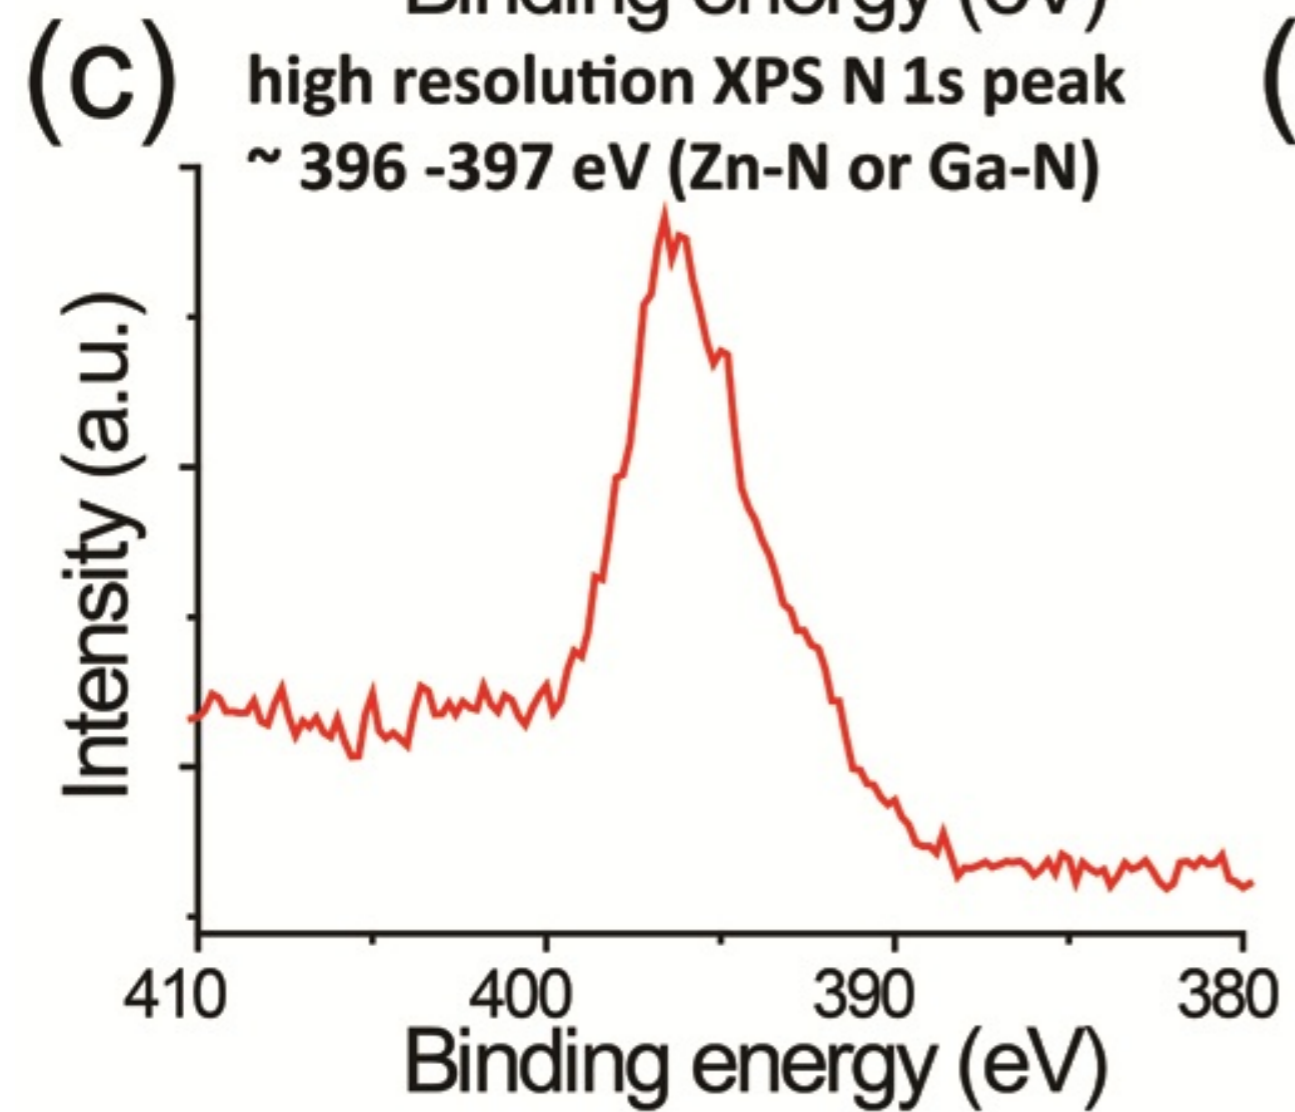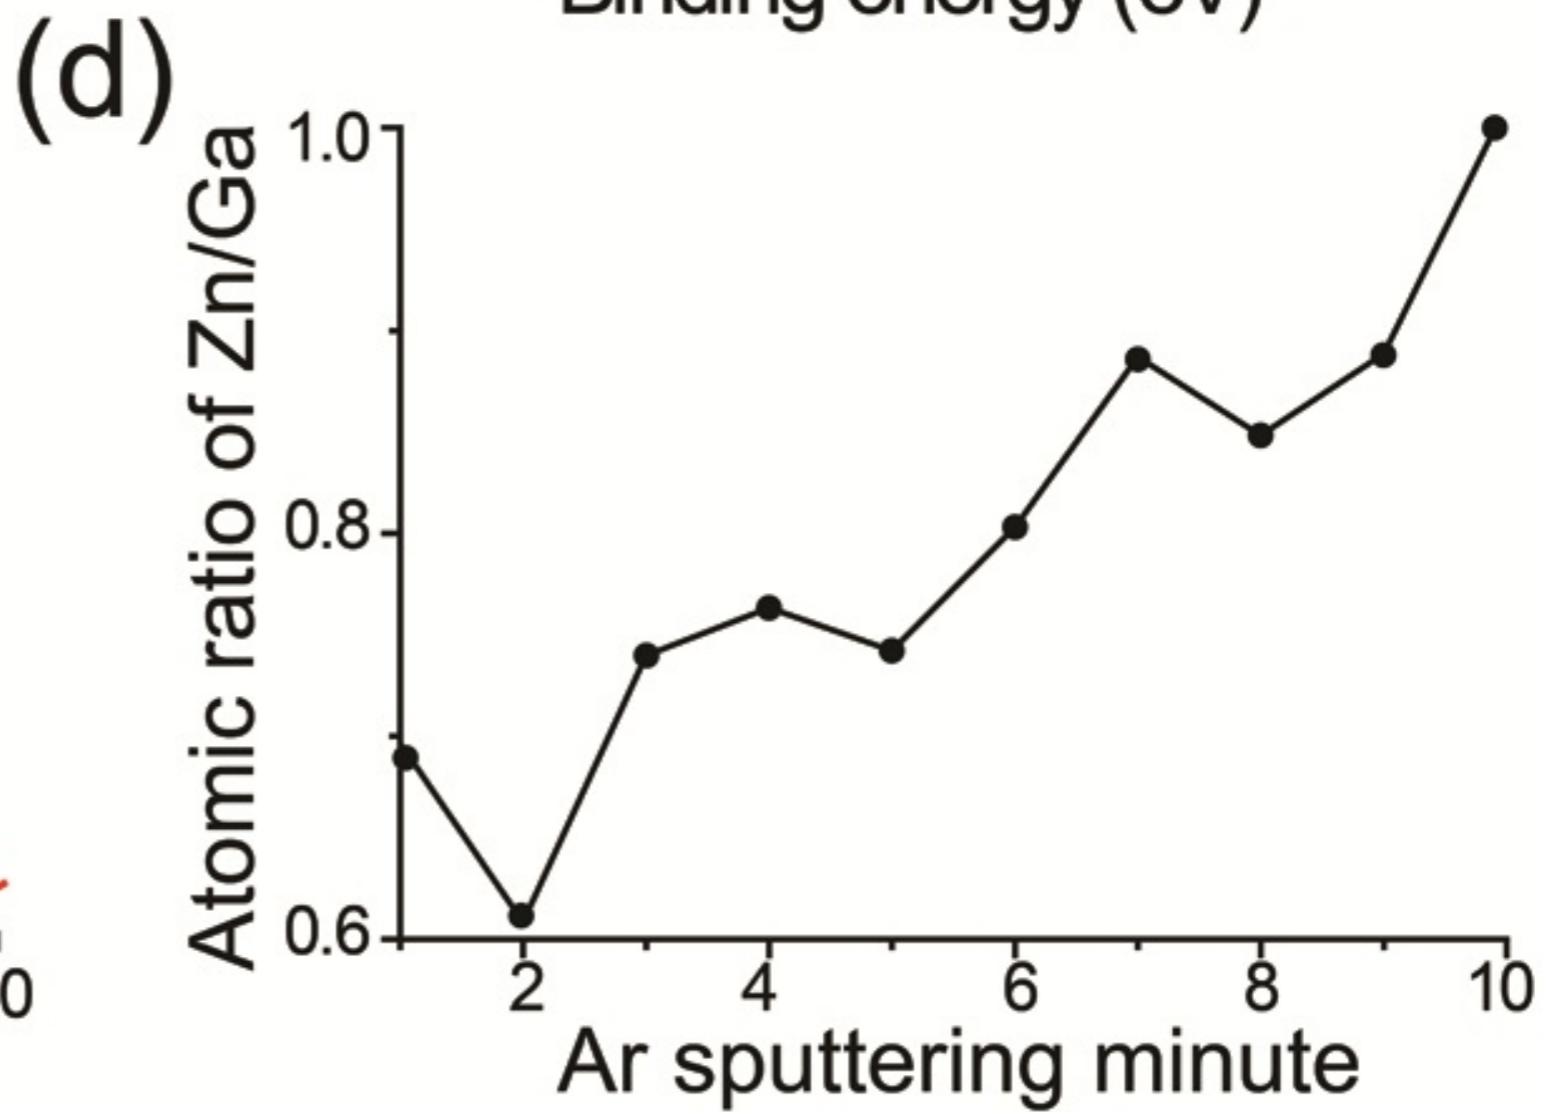

Supplement: c3ee43806f2.pdf [file c3ee43806f2.pdf]

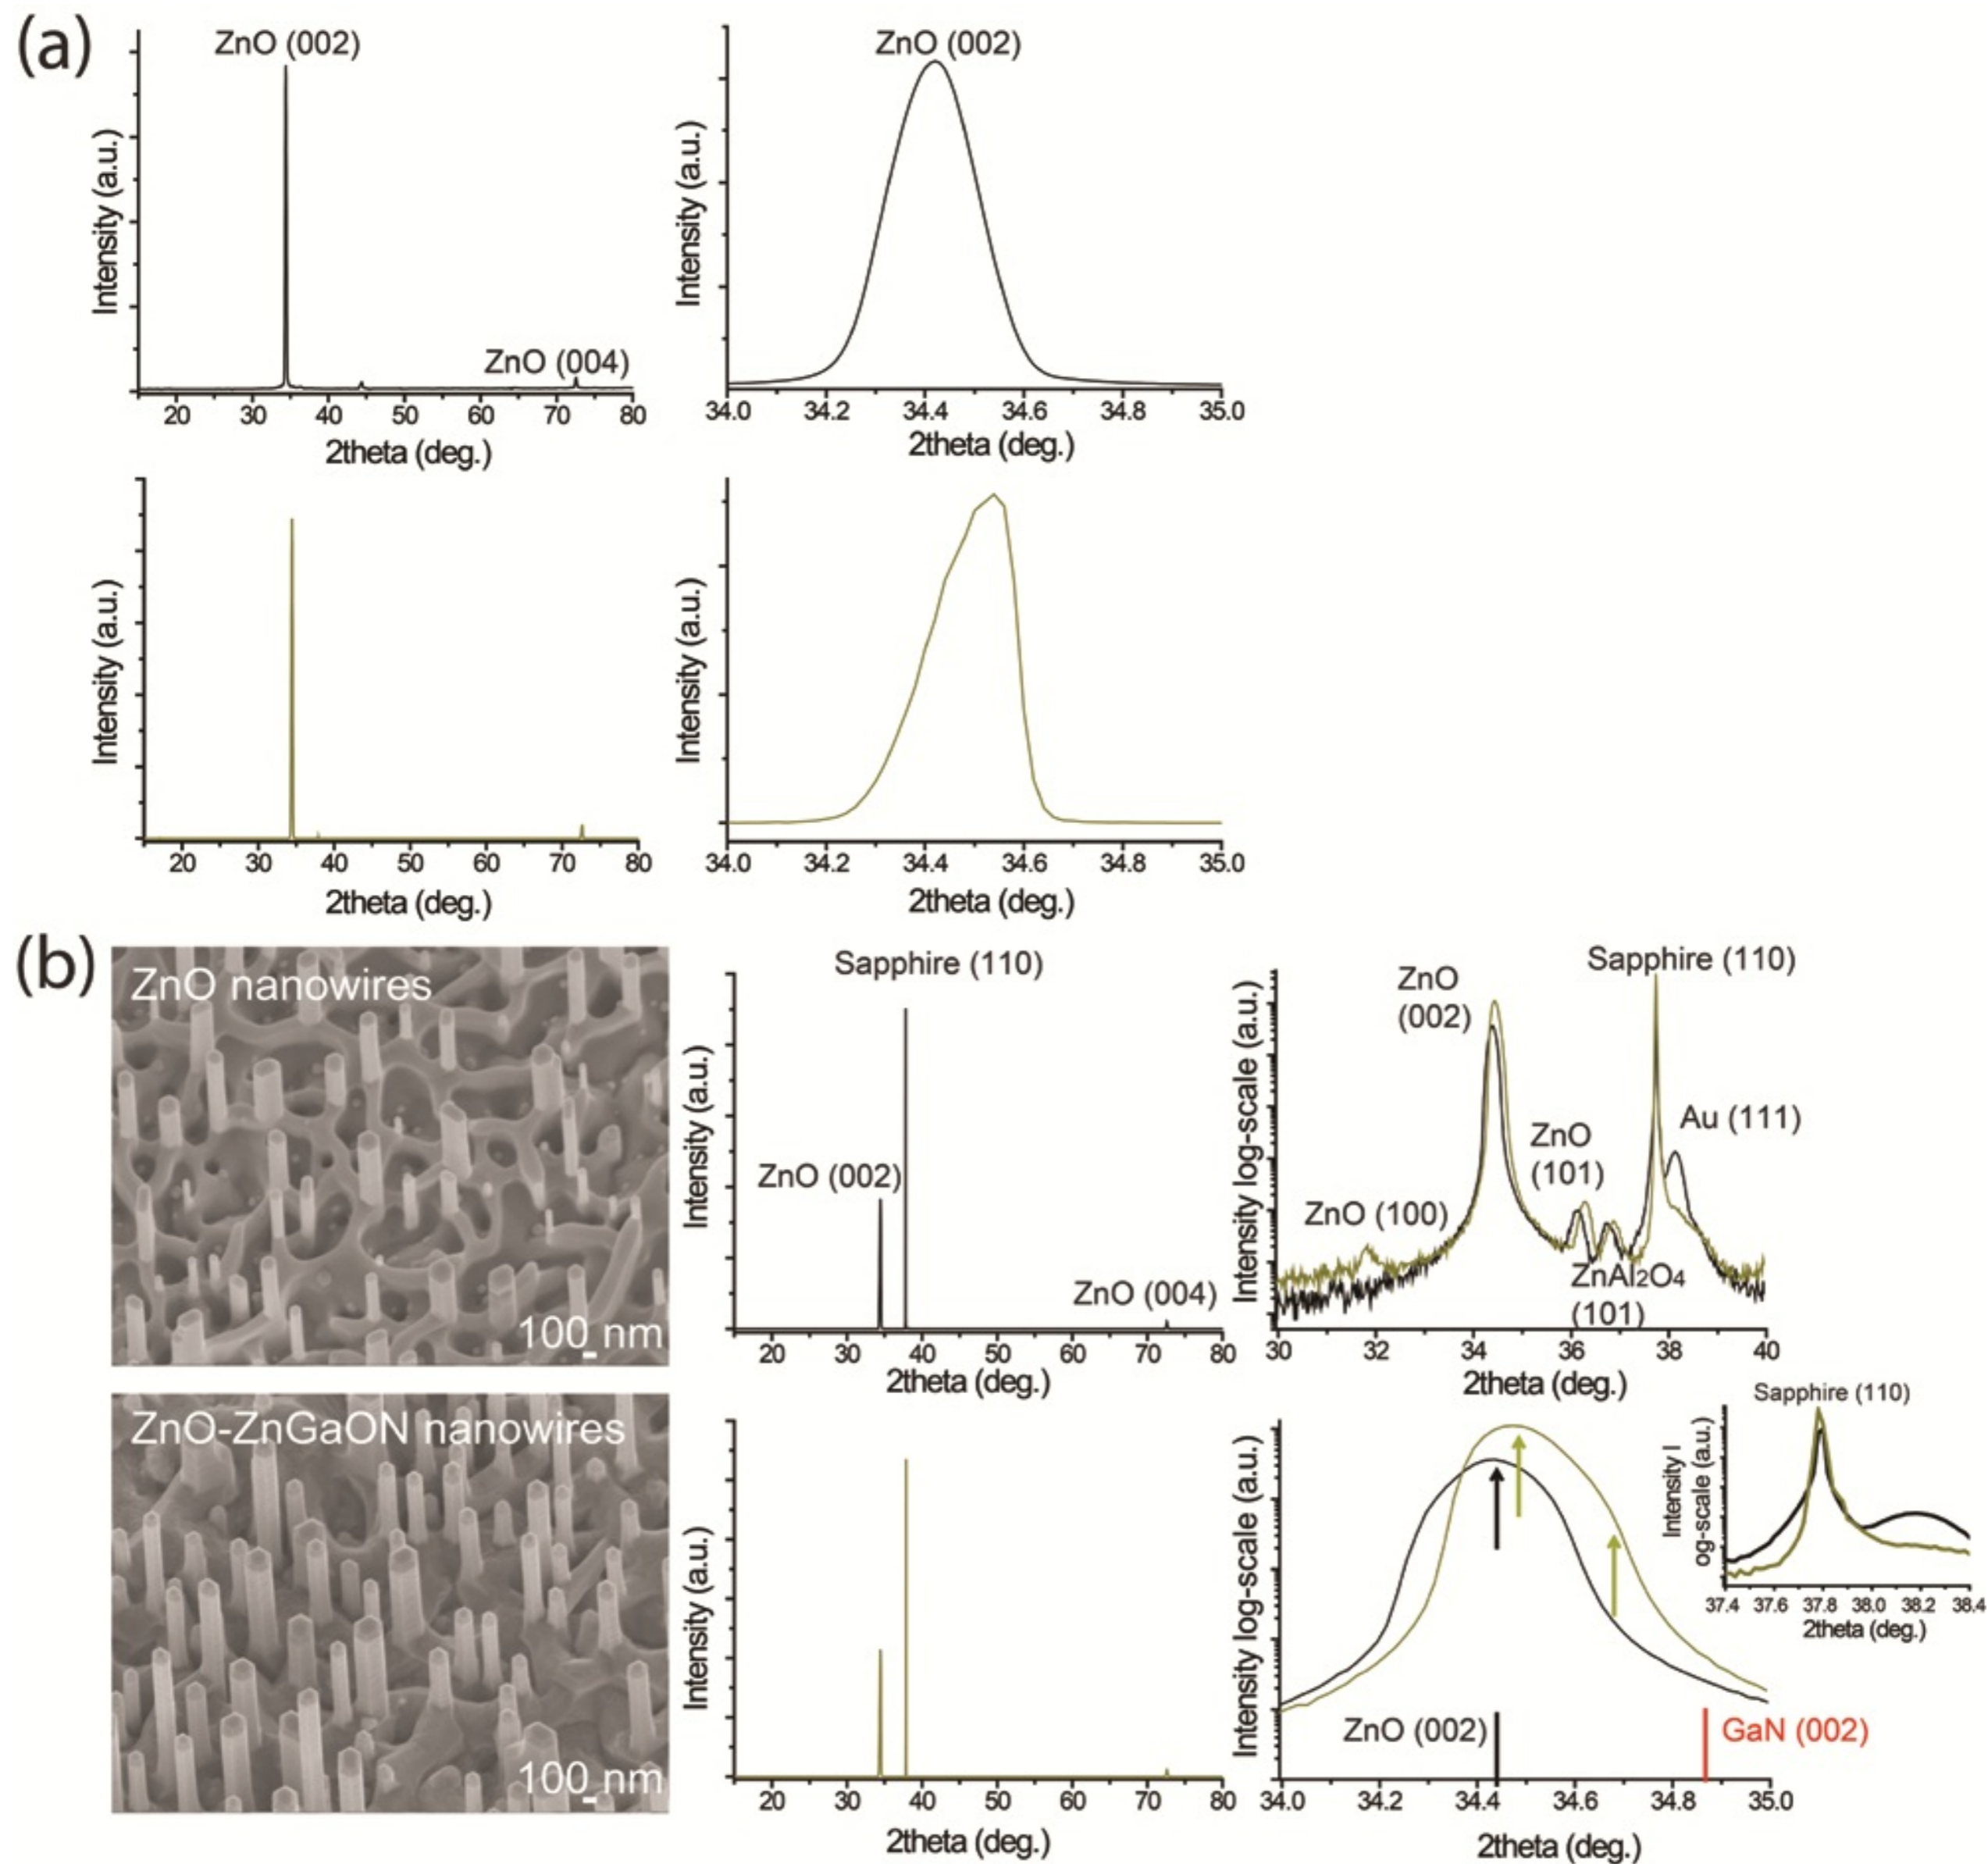

Supplement: c3ee43806f3.pdf [file c3ee43806f3.pdf]
